# Supplementary material for: Graph Peak Caller: Calling ChIP-seq peaks on graph-based reference genomes
Source: PubMed Central journal article supplement (PMC6396939; doi:10.1371/journal.pcbi.1006731), 2019-02-19
Supplement: pcbi.1006731.s001.pdf [file pcbi.1006731.s001.pdf]

**Table S1** Overview of peaks reported by Graph Peak Caller and MACS2 on *Drosophila melanogaster* and human for 5 transcription factors (TFs). In this comparison, the top scoring peaks detected by each peak caller are selected, by for each transcription factor selecting as many peaks as have been detected by the peak caller that is finding the least amount of peaks (*total*). *Shared* are peaks that overlap with a peak from the other peak caller, and *unique* are peaks reported by one peak caller and not the other. The sections *Motif enrichment Graph Peak Caller* and *Motif enrichment MACS2* show the number of shared and unique peaks that have motif match along with the percentages showing the proportion of shared and unique peaks having motif mtach. All peaks have been trimmed to 120 base pairs around the peak summit (position in peak with lowest q-value), to make the comparison clearer.

|              | Graph Peak Caller |             |        |           |        | MACS2 |             |        |          |        |
|--------------|-------------------|-------------|--------|-----------|--------|-------|-------------|--------|----------|--------|
|              | Total             | Shared      |        | Unique    |        | Total | Shared      |        | Unique   |        |
| <i>Human</i> |                   |             |        |           |        |       |             |        |          |        |
| CTCF         | 49049             | 36003/46279 | 77.80% | 959/2770  | 34.62% | 47320 | 35932/46279 | 77.64% | 391/1041 | 37.56% |
| SRF          | 19123             | 4711/16640  | 28.31% | 294/2483  | 11.84% | 17963 | 4706/16640  | 28.28% | 156/1323 | 11.79% |
| SUM          | 68172             | 40714/62919 | 64.71% | 1253/5253 | 23.85% | 65283 | 40638/62919 | 64.59% | 547/2364 | 23.14% |
| <i>D. m.</i> |                   |             |        |           |        |       |             |        |          |        |
| JRA          | 8717              | 362/8105    | 4.47%  | 23/612    | 3.76%  | 8679  | 359/8105    | 4.43%  | 12/574   | 2.09%  |
| SQZ          | 10374             | 1868/9374   | 19.93% | 171/1000  | 17.10% | 10025 | 1832/9374   | 19.54% | 89/651   | 13.67% |
| JIM          | 5385              | 1220/4924   | 24.78% | 66/461    | 14.32% | 5607  | 1215/4924   | 24.68% | 82/683   | 12.01% |
| ANTP         | 7093              | 94/6409     | 1.47%  | 11/684    | 1.61%  | 6917  | 91/6409     | 1.42%  | 4/508    | 0.79%  |
| SUM          | 31569             | 3544/28812  | 12.30% | 271/2757  | 9.83%  | 31228 | 3497/28812  | 12.14% | 187/2416 | 7.74%  |
