# Supplementary material for: Graph Peak Caller: Calling ChIP-seq peaks on graph-based reference genomes
Source: PubMed Central journal article supplement (PMC6396939; doi:10.1371/journal.pcbi.1006731), 2019-02-19
Supplement: pcbi.1006731.s002.pdf [file pcbi.1006731.s002.pdf]

**Table S2** Average number of base pairs not included in the linear reference genome within peak sets. Here, all peaks have been trimmed to 120 base pairs around the peak summit (position in peak with lowest q-value), to make the comparison clearer.

**Average number of base pairs not part of linear reference genome**

|                        | Peaks found by Graph Peak Caller that also were found by MACS2 | Peaks found uniquely by Graph Peak Caller |
|------------------------|----------------------------------------------------------------|-------------------------------------------|
| <i>A. thaliana</i>     |                                                                |                                           |
| ERF115                 | 0.863                                                          | 3.712                                     |
| SEP3                   | 0.657                                                          | 2.092                                     |
| AP1                    | 0.592                                                          | 2.110                                     |
| SOC1                   | 0.384                                                          | 0.917                                     |
| PI                     | 0.820                                                          | 2.548                                     |
| <i>D. melanogaster</i> |                                                                |                                           |
| JRA                    | 0.069                                                          | 0.360                                     |
| SQZ                    | 0.095                                                          | 0.408                                     |
| JIM                    | 0.074                                                          | 0.426                                     |
| ANTP                   | 0.075                                                          | 0.412                                     |
| <i>Human</i>           |                                                                |                                           |
| CTCF                   | 0.583                                                          | 2.385                                     |
| SRF                    | 0.448                                                          | 2.274                                     |
