# Supplementary material for: Graph Peak Caller: Calling ChIP-seq peaks on graph-based reference genomes
Source: PubMed Central journal article supplement (PMC6396939; doi:10.1371/journal.pcbi.1006731), 2019-02-19
Supplement: pcbi.1006731.s003.pdf [file pcbi.1006731.s003.pdf]

**Table S3.** Similar to Table 1 in the manuscript, but instead of MACS2 using reads aligned by BWA, it uses vg alignments projected to the linear reference genome.

|        | Graph Peak Caller |            |        |           |       | MACS2 |            |        |           |        |
|--------|-------------------|------------|--------|-----------|-------|-------|------------|--------|-----------|--------|
|        | Total             | Shared     |        | Unique    |       | Total | Shared     |        | Unique    |        |
| ERF115 | 24976             | 3121/21364 | 14.61% | 284/3612  | 7.86% | 23167 | 3108/21364 | 14.55% | 214/1803  | 11.87% |
| SEP3   | 14976             | 989/11982  | 8.25%  | 125/2994  | 4.18% | 15517 | 978/11982  | 8.16%  | 148/3535  | 4.19%  |
| AP1    | 16797             | 764/13405  | 5.70%  | 102/3392  | 3.01% | 17030 | 754/13405  | 5.62%  | 94/3625   | 2.59%  |
| SOC1   | 15502             | 1676/14297 | 11.72% | 116/1205  | 9.63% | 16407 | 1681/14297 | 11.76% | 142/2110  | 6.73%  |
| PI     | 17518             | 1790/14084 | 12.71% | 300/3434  | 8.74% | 16084 | 1793/14084 | 12.73% | 152/2000  | 7.60%  |
| SUM    | 89769             | 8340/75132 | 11.10% | 927/14637 | 6.33% | 88205 | 8314/75132 | 11.07% | 750/13073 | 5.74%  |
