# Supplementary material for: Graph Peak Caller: Calling ChIP-seq peaks on graph-based reference genomes
Source: PubMed Central journal article supplement (PMC6396939; doi:10.1371/journal.pcbi.1006731), 2019-02-19
Supplement: pcbi.1006731.s008.pdf [file pcbi.1006731.s008.pdf]

## S2 Appendix - Reads behind Figure 3

The following fastq reads overlap with the region shown in Figure 3 (reads ID from fastq with SRA ID SRR931836).

SRR931836.531994, SRR931836.952533, SRR931836.1053622, SRR931836.1069887, SRR931836.1420071, SRR931836.1569407, SRR931836.2175300, SRR931836.2611801, SRR931836.2851952, SRR931836.3202289, SRR931836.3224927, SRR931836.4770490, SRR931836.5407974, SRR931836.6352336, SRR931836.7388866, SRR931836.7505309, SRR931836.7713938, SRR931836.7918128, SRR931836.8527838, SRR931836.8677342, SRR931836.9036755, SRR931836.9101957, SRR931836.9526182, SRR931836.9557079, SRR931836.9597616, SRR931836.10067214, SRR931836.11485357, SRR931836.11791390, SRR931836.11811808, SRR931836.12373570, SRR931836.14154848, SRR931836.14313085, SRR931836.14502580, SRR931836.16566511, SRR931836.16928475, SRR931836.17213611, SRR931836.17405600

These reads result in alignments with the following sequences when aligned to the *A. thaliana* reference graph (sequences are in same order as the read IDs above):

```
catctacctgttttcttgacggcgacatacaaaaaataaaacaaaac
ccttctctcatctacctgttttcttgacggcgacatacaaaaaat
catctacctgttttcttgacggcgacatacaaaaaataaaacaaaac
cttctctcatctacctgttttcttgacggcgacatacaaaaaat
aatccatttctcgttttcgatgtccttctctcatctacctgtttt
gacatacaaaaaataaaacaaaacagaaccctagatgggtgatgggct
tctcgtttcgtatgccttctctcatctacctgttttcttgacgg
tttctcgtttcgtatgccttctctcatctacctgttttcttg
gacggcgacatacaaaaaataaaacaaaacagaaccctagatgggtg
tctcatctacctgttttcttgacggcgacatacaaaaaataaa
ccatttctcgttttcgatgtccttctctcatctacctgttttct
gacggcgacatacaaaaaataaaacaaaacagaaccctagatgggtgga
gtttcgtatgccttctctcatctacctgttttcttgacggcgac
gacggcgacatacaaaaaataaaacaaaacagaaccctagatgggtg
ttctcgtttcgtatgccttctctcatctacctgttttcttgacg
tctcgtttcgtatgccttctctcatctacctgttttcttgacgg
ctacctgttttcttgacggcgacatacaaaaaataaaacaaaac
gtttcgtatgccttctctcatctacctgttttcttgacggcgac
ctacctgttttcttgacggcgacatacaaaaaataaaacaaaac
cgtatgccttctctcatctacctgttttcttgacggcgacataca
cgtttcgtatgccttctctcatctacctgttttcttgacggcga
ccttctctcatctacctgttttcttgacggcgacatacaaaaaat
cctgttttcttgacggcgacatacaaaaaataaaacaaaacagaacc
tctcgtttcgtatgccttctctcatctacctgttttcttgacgg
tttcttgacggcgacatacaaaaaataaaacaaaacagaaccct
gttttcttgacggcgacatacaaaaaataaaacaaaacagaacccta
acctgttttcttgacggcgacatacaaaaaataaaacaaaacagaac
catctacctgttttcttgacggcgacatacaaaaaataaaacaaaac
ttttcttgacggcgacatacaaaaaataaaacaaaacagaaccct
atgccttctctcatctacctgttttcttgacggcgacatacaaa
ttgacggcgacatacaaaaaataaaacaaaacagaaccctagatgggtg
gatgccttctctcatctacctgttttcttgacggcgacatacaa
cacaatccatttctcgttttcgatgtccttctctcatctacctgt
atccatttctcgttttcgatgtccttctctcatctacctgttttct
ttgacggcgacatacaaaaaataaaacaaaacagaaccctagatgggtg
tttcttgacggcgacatacaaaaaataaaacaaaacagaaccctaga
cgtttcgtatgccttctctcatctacctgttttcttgacggcga
```

This is the sequence on haplotype 628 from the 1001 genomes vcf ([http://1001genomes.org/data/GMI-MPI/releases/v3.1/1001genomes\\_snp-short-indel\\_only\\_A\\_CGTN.vcf.gz](http://1001genomes.org/data/GMI-MPI/releases/v3.1/1001genomes_snp-short-indel_only_A_CGTN.vcf.gz)) used to build the graph:

```
CACAAATCCATTTTCTCGTTTTCGATGTCCTTCTTTCATCTACCTTGTTTTCTTTGACGGCGACATACAAAAATAAAACA  
AAACAGAACCCTAGATGGGTGTGATGGGCT
```

All above sequences are found within this sequence, either direct or in reverse complement.
