# Supplementary material for: Graph Peak Caller: Calling ChIP-seq peaks on graph-based reference genomes
Source: PubMed Central journal article supplement (PMC6396939; doi:10.1371/journal.pcbi.1006731), 2019-02-19
Supplement: pcbi.1006731.s009.pdf [file pcbi.1006731.s009.pdf]

## S3 Appendix

### Alignment motif enrichment:

Sequences for alignments were extracted from the reference and Fimo was used to find motif-matches, with the same parameters as when evaluating the peak callers:

|                     | ERF115   | SOC1    | SEP3    | AP1     | PI      | Aggr     |
|---------------------|----------|---------|---------|---------|---------|----------|
| Alignments MACS2    | 10800502 | 2871375 | 7888164 | 8430747 | 9807817 | 39798605 |
| Alignments GPC      | 11472730 | 3587887 | 8592532 | 9021976 | 9994855 | 42669980 |
| Motif matches MACS2 | 331839   | 45023   | 132673  | 161919  | 241856  | 913310   |
| Motif matches GPC   | 348812   | 47861   | 139799  | 172421  | 248433  | 957326   |
| Motif rate MACS2    | 0.0307   | 0.0157  | 0.0168  | 0.0192  | 0.0247  | 0.0214   |
| Motif rate GPC      | 0.0304   | 0.0133  | 0.0163  | 0.0191  | 0.0249  | 0.0208   |

### Haplotype analysis:

Variants were found by mapping node ids to VCF-file variants. An interval is considered consistent with a haplotype in the vcf if all the variants included in the interval is present in the haplotype.

### Haplotype consistency of motif-intervals:

Here we extracted the graph interval corresponding to all the motif-matches on the graph peak caller predicted peaks, and checked whether the interval was consistent with a haplotype in the vcf. The table shows [n\_haplotype\_consistent\_motifs/n\_total\_motifs haplotype\_consistent\_ratio]

|        | ERF115              | PI                  | SOC1                | AP1               | SEP3                | Aggr                              |
|--------|---------------------|---------------------|---------------------|-------------------|---------------------|-----------------------------------|
| Unique | 284/284<br>1.0      | 296/300<br>0.9867   | 113/116<br>0.9741   | 98/102<br>0.9608  | 123/125<br>0.9840   | <b>914/927</b><br><b>0.9860</b>   |
| Shared | 3119/3121<br>0.9994 | 1777/1790<br>0.9927 | 1673/1676<br>0.9982 | 760/764<br>0.9948 | 986/989<br>0.9970   | 8315/8340<br>0.9970               |
| Aggr   | 3403/3405<br>0.9994 | 2073/2090<br>0.9919 | 1786/1792<br>0.9967 | 858/866<br>0.9908 | 1109/1114<br>0.9955 | <b>9229/9267</b><br><b>0.9959</b> |

Removing all motif-matches that doesn't correspond to a single haplotype gives the ratio of matches on unique peaks  $914/14637=0.624$ , which is still significantly better than for Macs,  $p=3.80\%$ .

### Motifs on diplotype-consistent peaks:

Here we filtered out all peaks from graph peak caller that didn't have diplotype consistent alignments. To be diplotype consistent we required that all alignments that overlap with the peak were compatible with either of two haplotypes from the vcf:

|                                  | ERF115 | PI     | SOC1   | AP1    | SEP3   | Aggr          |
|----------------------------------|--------|--------|--------|--------|--------|---------------|
| Number of peaks                  | 1987   | 2320   | 396    | 1955   | 1475   | 8133          |
| Number of peaks with motif match | 179    | 204    | 32     | 51     | 50     | 516           |
| Ratio of peaks with motif match  | 0.0901 | 0.0879 | 0.0808 | 0.0261 | 0.0339 | <b>0.0634</b> |

Only considering diploid-consistent peaks gives a motif-match ratio of 0.0634, which is still significantly higher than for MACS ( $p=3.47\%$ )

## Diplotype effect compared with MACS

Here we checked the ratio of motif matches on diplotype-consistent peaks and not diplotype-consistent peaks for both MACS and GPC. We see that the difference in motif ratio between diploid- and not-diploid-consistent peaks are very similar for MACS and GPC peaks

|                  | ERF115        | PI             | SOC1           | AP1            | SEP3           |
|------------------|---------------|----------------|----------------|----------------|----------------|
| MACS-DIP         | 0.1310        | 0.0708         | 0.0597         | 0.0270         | 0.0396         |
| MACS-NOT-DIP     | 0.0793        | 0.1034         | 0.0930         | 0.0215         | 0.0504         |
| <b>MACS-DIFF</b> | <b>0.0518</b> | <b>-0.0327</b> | <b>-0.0333</b> | <b>0.0055</b>  | <b>-0.0108</b> |
| GPC-DIP          | 0.0900        | 0.0879         | 0.0808         | 0.0261         | 0.0339         |
| GPC-NOT-DIP      | 0.0793        | 0.1034         | 0.0930         | 0.0215         | 0.0504         |
| <b>GPC-DIFF</b>  | <b>0.0255</b> | <b>0.0018</b>  | <b>-0.0230</b> | <b>-0.0094</b> | <b>-0.0155</b> |
